# Supplementary material for: Synthesis and activity of a diselenide bond mimetic of the antimicrobial protein caenopore-5
Source: Royal Society of Chemistry journal article supplement (doi:10.1039/c5sc04187b), 2015-12-08
Supplement: c5sc04187b1.pdf [file c5sc04187b1.pdf]

## Supporting Information

### Synthesis and Activity of a Diselenide Bond Mimetic of the Antimicrobial Protein Caenopore-5.

Karima Medini, Paul. W. R. Harris, Ayana Menorca, Kiel Hards, Gregory. M. Cook, Margaret. A. Brimble.

#### 1. General Experiential.

All solvents and reagents were used as supplied. *O*-(Benzotriazol-1-yl)-*N,N,N',N'*-tetramethyluronium hexafluorophosphate (HBTU), (*O*-(7-azabenzotriazol-1-yl)-*N,N,N',N'*-tetramethyluronium hexafluorophosphate) (HATU), benzotriazol-1-yloxy)tris(dimethylamino)phosphonium hexafluorophosphate (BOP), benzotriazol-1-yloxy)tripyrrolidinophosphonium hexafluorophosphate (PyBOP) and *S*-trityl mercaptopropionic acid were purchased from GL Biochem (Shanghai, China). Dimethylformamide (DMF) (AR grade) and acetonitrile (HPLC grade) were purchased from Scharlau (Barcelona, Spain). *N, N'* diisopropylethylamine (DIPEA), piperidine, ethanedithiol (EDT), diisopropylcarbodiimide (DIC), triisopropylsilane (TIS), were purchased from Aldrich (St Louis, MO) and *N*-methylpyrrolidine (NMP) was purchased from Fluka (Buchs, Switzerland). TFA was purchased from Halocarbon (River Edge, NJ). Anhydrous hydrogen fluoride was obtained from Matheson Trigas (Basking Ridge, NJ). Aminomethyl polystyrene (AM-PS) resin was synthesised “in house” as described. Boc-Ala-PAM (PAM = phenylacetamidomethyl) linker and Fmoc-Glu(tBu)-HMPP (HMPP = hydroxymethylphenoxypropionic acid) was purchased from Polypeptides (Strasbourg, France). Fmoc-amino acids were purchased from GL Biochem with the following side chain protection: Fmoc-Arg(Pbf)-OH (Pbf = 2,2,4,6,7-pentamethyldihydrobenzofuran-5-sulfonyl), Fmoc-Asn(Trt)-OH (Trt = triphenylmethyl), Fmoc-Asp(tBu)-OH (tBu = *tert*-butyl), Fmoc-Cys(Trt)-OH, Fmoc-Gln(Trt)-OH, Fmoc-Glu(tBu)-OH, Fmoc-His(Trt)-OH, Fmoc-Lys(Boc)-OH, Fmoc-Ser(tBu)-OH, Fmoc-Thr(tBu)-OH, Fmoc-Tyr(tBu)-OH and Fmoc-Trp(Boc)-OH. Boc-amino acids were purchased from Polypeptides with the following side chain protection: Boc-Arg(Tos)-OH (Tos = *p*-toluenesulfonyl), Boc-

Asp(cHex)-OH (cHex = cyclohexyl), Boc-Cys(4-MeBn)-OH (Bn = benzyl), Boc-Asn(Xan)-OH (Xan = Xanthyl), Boc-Glu(cHex)-OH, Boc-His(Bom)-OH (Bom = benzyloxymethyl), Boc-His(Tos)-OH.DCHA (DCHA = dicyclohexylamine), Boc-Lys(2-Cl-Z)-OH (Z = benzyloxycarbonyl), Boc-Ser(Bn)-OH, Boc-Thr(Bn)-OH, Boc-Tyr(2-Br-Z)-OH, Boc-Trp(CHO)-OH. Boc-S-4-methoxybenzyl selenocysteine was obtained from ChemPep Inc (Wellington, FL, USA)

## 2. General: HPLC and LC-MS.

Peptides were purified using a Dionex (Sunnyvale, California, U.S) Ultimate 3000 system equipped with a Foxy Jr fraction collector using a Gemini C18 column (5  $\mu$ ; 10.0 x 250 mm) column [Phenomenex (Torrance, California, U.S)] using a flow rate of 5 mL/min and eluted with an appropriate shallow gradient of increasing concentration of acetonitrile containing 0.1% TFA. The solvent system used was A (0.1% TFA in H<sub>2</sub>O) and B (0.1% TFA in CH<sub>3</sub>CN).

The purity and peptide masses were confirmed by LC-MS [Agilent Technologies (Santa Clara, California, U.S) 1120 Compact LC equipped with a Hewlett Packard (Palo Alto, California, U.S) 1100 MSD mass spectrometer] using ESI in the positive mode. The fractions were monitored using an Agilent Zorbax C3 (3.5  $\mu$ ; 3.0 x 150 mm) column at 0.3 mL/min with a linear gradient of 5–65%B over 21 min (i.e. 3% B per minute). The solvent system used was A (0.1% formic acid in H<sub>2</sub>O) and B (0.1% formic acid in CH<sub>3</sub>CN). Fractions were collected, after being analyzed by LC-MS, pooled, and lyophilized.

## 3. Synthesis of selenocysteine analogue: <sup>7</sup>Sec-<sup>81</sup>Sec-Cp-5 (1).

### A. Thioester fragment: <sup>1</sup>Gly-<sup>7</sup>Sec-<sup>35</sup>Glu-COSCH<sub>2</sub>CH<sub>2</sub>-Ala-OH (2)

Boc-Ala-PAM linker (0.2 mmol) was coupled to aminomethyl resin synthesized as described by Harris *et al.*<sup>1</sup> (loading 1 mmol/g) with DIC (0.4 mmol) in CH<sub>2</sub>Cl<sub>2</sub> (3 mL) for 1 h, drained and washed with CH<sub>2</sub>Cl<sub>2</sub>. The Boc group was removed by treatment with neat TFA and a solution of *S*-trityl-3-mercaptopropionic acid (5 equiv.) /HATU (5 equiv) and <sup>i</sup>Pr<sub>2</sub>EtN (12 equiv) was added and the mixture stood for 20 min. The

trityl group was deprotected using TFA/TIPS/H<sub>2</sub>O (95/2.5/2.5, v/v/v) for 2 min. and Boc-Glu-(OcHex)-OH (0.4 mmol) was coupled using HBTU (0.39 mol)/ *i*Pr<sub>2</sub>EtN (1 mmol) in 0.95 mL DMF for 1 h. The remaining amino acids were coupled using the Boc *in situ* neutralisation procedure<sup>2</sup> using 100% TFA as deblocking reagent (1 x 2 min) and HATU/*i*Pr<sub>2</sub>NEt as coupling reagent (1 x 5 min). Boc-*S*-4-methoxybenzyl selenocysteine was coupled using HATU/*i*Pr<sub>2</sub>EtN for 15 min. Following chain assembly, concomitant reduction of Met(O) and final Boc group removal was carried out on resin using NH<sub>4</sub>I/TFA/Me<sub>2</sub>S as described by Vilaseca *et al.*<sup>3</sup> The crude peptides **2** was cleaved from the resin with simultaneous removal of side chain protecting groups using HF/*p*-cresol (20:1, v/v) for 1 h at 0°C. Following evaporation of HF, the peptides were precipitated with cold diethyl ether, isolated by centrifugation, washed twice with cold diethyl ether, dissolved in 1:1 (v/v) CH<sub>3</sub>CN/H<sub>2</sub>O containing 0.1% TFA, filtered, and lyophilized. Purification using a slow gradient of 0.1 % CH<sub>3</sub>CN per min on a Gemini C18 column (5 μ; 10.0 x 250 nm) as described by Harris *et al.*<sup>4</sup> afforded **2** (53 mg, 38% yield).

### B. Cysteinyl fragment: <sup>36</sup>Cys-<sup>81</sup>Sec-<sup>82</sup>Pro-COOH (**3**)

Boc-Pro-PAM linker (0.2 mmol) was coupled to aminomethyl resin (0.1 g for 0.1 mmol scale, loading 1 mmol/g) with DIC (0.4 mmol) in CH<sub>2</sub>Cl<sub>2</sub> (3 mL) for 1 h, drained and washed with CH<sub>2</sub>Cl<sub>2</sub>. The peptide was assembled using the Boc *in situ* neutralisation procedure<sup>2</sup> using 100% TFA as deblocking reagent (1 x 2 min) and HATU/*i*Pr<sub>2</sub>NEt as coupling reagent (1 x 5 min). Boc-*S*-4-methoxybenzyl selenocysteine was coupled using HATU/*i*Pr<sub>2</sub>EtN for 15 min. Following chain assembly, the crude peptide **3** was cleaved from the resin as described above to afford crude **3**, which was purified with a slow gradient of 0.1 % CH<sub>3</sub>CN per min on a Gemini C18 column (5 μ; 10.0 x 250 nm) as described by Harris *et al.*<sup>4</sup> to give **3** (65 mg, 43% yield).

Both fragments **1** and **2** were aliquot into 1 mg sample to avoid selenol oxidation when handled.

#### **4. Native chemical ligation of selenocysteine analogue Cp-5.**

The two reactants, thioester fragment **2** and cysteinyl fragment **3** were dissolved in a solution of 6 M Gd.HCl, 0.2 M Na<sub>2</sub>HPO<sub>4</sub> (pre degassed with argon) containing 1 % v/v PhSH / at a final peptide concentration of 5 mM, and the pH was readjusted to 7.5. The vial was capped under argon and the reaction mixture was left stirring at room temperature. A 2 μL aliquot of the reaction mixture was diluted four-fold into an aqueous solution (5% TFA v/v) for LC-MS analysis. After 10 h the reaction reached completion and was quenched by the addition of 0.2 M Na<sub>2</sub>HPO<sub>4</sub> at different pH (5, 3 and 2) to optimize the purification. The crude ligation product was purified by RP-HPLC to yield ligated peptide **4** (32% yield) [(M+10H)<sup>+10</sup> observed = 921.2 Da; (M+10H)<sup>+10</sup>calculated reduced = 922.0 Da].

#### **5. Protein folding.**

The protein was refolded for 4 hours in a buffer containing 50 mM Tris-HCl, pH 7.4, 150 mM NaCl and 2 mM oxidised glutathione at 4 °C (no reduced glutathione was used to avoid any deselenization reaction). Precipitated protein was removed by centrifugation at 6,000 g at 4 °C, for 15 min. This solution was purified by size exclusion chromatography.

#### **6. Size-exclusion chromatography.**

Size-exclusion chromatography at 4 °C was used as the final purification step to isolate [<sup>7</sup>Sec-<sup>81</sup>Sec]-Cp-5 (**1**) as a monomer. The protein was loaded at 1 mL/min onto a Hi-Load Superdex 75 prep grade (10/30) column (GE Healthcare), which was connected to an ÄKTA-FPLC system controlled by the UNICORN software (GE Healthcare). The column was pre-equilibrated with 2 column volumes of 20 mM sodium phosphate at pH 5.2, the optimum pH of the native protein. The elution profile was monitored by measurement of UV-absorbance at 280 nm (Figure S1). The folded analogue [<sup>7</sup>Sec-<sup>81</sup>Sec]-Cp-5 (**1**) was identified by mass spectrometry to be present in fractions 14-16 hence they were combined together (2 mg, 35 %). A shoulder peak was also observed (fractions 17-18) that was established to be by-products resulting from the folding reaction.

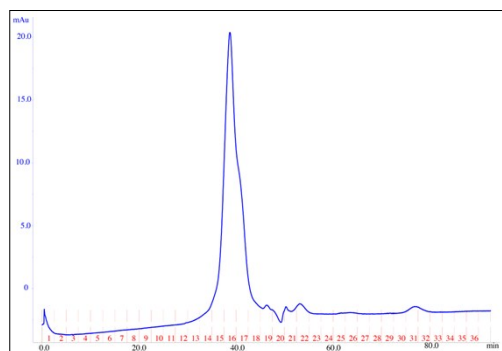

**Figure S1.** Chromatogram of the size-exclusion purification at a 1 mL / min flow rate. The absorbance (milli-absorbance units) of the flow-through was monitored at 280 nm against time (min). Fractions 14-16 contained [<sup>7</sup>Sec-<sup>81</sup>Sec]-Cp-5 (1).

## 7. Circular Dichroism.

All CD measurements were performed on a PiStar spectrometer [Applied Photophysics (Leatherhead, UK)]. Protein spectra data are reported in terms of the mean residue ellipticity ( $\theta$ ) (deg.cm<sup>2</sup>/dmol), calculated as follows:<sup>5</sup>

$$\theta = S / (10 \times c \times L \times n)$$

$S$  is the raw CD signal in millidegrees,  $c$  is the protein concentration (M),  $L$  is the cuvette path length (cm), and  $n$  is the number of peptide bonds in the protein. The CD spectrum measurement represents the average of seven scans obtained with a 2 nm optical bandwidth. Baseline spectra were collected with buffer alone and then subtracted from the raw protein spectra. The measurements were performed at protein concentrations of 5  $\mu$ M in 20 mM sodium phosphate buffer, pH 5.2 at 25 °C in 1 mm quartz cuvettes [Hellma Analytics, (Müllheim, Germany)]. Thermal transition experiments were recorded using peptide solutions at 10  $\mu$ M in 20 mM sodium phosphate buffer, pH 5.2 that had been incubated at 5 °C for a minimum of 24 hours. The solutions were heated from 5 to 80 °C in 2 °C steps with a three minute equilibration time at each step.

## 8. Fluorescence quenching dependent on $\Delta\text{pH}$

Proton translocation into inverted membrane vesicles was measured by the quenching of the fluorescent, pH-dependent probe, acridine orange (AO) using a Cary Eclipse Fluorescence spectrophotometer. The assay buffer contained 10 mM HEPES (pH 6.0), 100 mM KCl, 5 mM  $\text{MgCl}_2$ , 0.085 mg/mL *E. coli* inverted membrane vesicles and 2.5  $\mu\text{M}$  AO. The reactions were initiated with 50  $\mu\text{M}$  NADH and quenching reversed as indicated (R). The excitation and emission wavelengths were 493 and 530 nm, respectively.

## 9. References.

1. P. W. R. Harris, S. H. Yang and M. A. Brimble, *Tetrahedron Lett*, 2011, **52**, 6024-6026.
2. M. Schnolzer, P. Alewood, A. Jones, D. Alewood and S. B. H. Kent, *Int. J. Pept. Res. Ther.*, 2007, **13**, 31-44.
3. M. Vilaseca, E. Nicolás, F. Capdevila and E. Giralt, *Tetrahedron*, 1998, **54**, 15273-15286.
4. P. W. R. Harris, D. J. Lee and M. A. Brimble, *Journal of Peptide Science*, 2012, **18**, 549-555.
5. S. M. Kelly, T. J. Jess and N. C. Price, *Biochimica et Biophysica Acta (BBA)-Proteins and Proteomics*, 2005, **1751**, 119-139.
